# Supplementary material for: Cadmium(ii) and zinc(ii) complexes with rigid 1-(1H-imidazol-4-yl)-3-(4H-tetrazol-5-yl)benzene and varied carboxylate ligands
Source: Royal Society of Chemistry journal article supplement (doi:10.1039/c3ce40150b), 2013-01-01
Supplement: c3ce40150b.pdf [file c3ce40150b.pdf]

## *Electronic supplementary information (ESI)*

### **Cadmium(II) and zinc(II) complexes with rigid 1-(1*H*-imidazol-4-yl)-3-(4*H*-tetrazol-5-yl)benzene and varied carboxylate ligands†**

Shui-Sheng Chen,<sup>\*a</sup> Rui Qiao,<sup>a</sup> Liang-Quan Sheng,<sup>a</sup> Yue Zhao,<sup>\*b</sup> Song Yang,<sup>a</sup>

Ming-Ming Chen,<sup>a</sup> Zhao-Di Liu<sup>a</sup> and Dei-Hai Wang<sup>a</sup>

<sup>a</sup> School of Chemistry and Chemical Engineering, Fuyang Normal College, Fuyang 236041, China E-mail: [chenss@fync.edu.cn](mailto:chenss@fync.edu.cn); Fax: +86 25 2596249

<sup>b</sup> Coordination Chemistry Institute, State Key Laboratory of Coordination Chemistry, School of Chemistry and Chemical Engineering, Nanjing National Laboratory of Microstructures, Nanjing University, Nanjing 210093, China E-mail: [zhaoyue@nju.edu.cn](mailto:zhaoyue@nju.edu.cn); Fax: +86 25 83597300

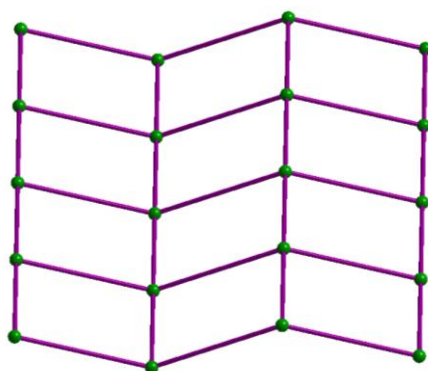

**Figure S1.** Schematic representation of 2D undulating network with (4, 4) topology in complex 3.

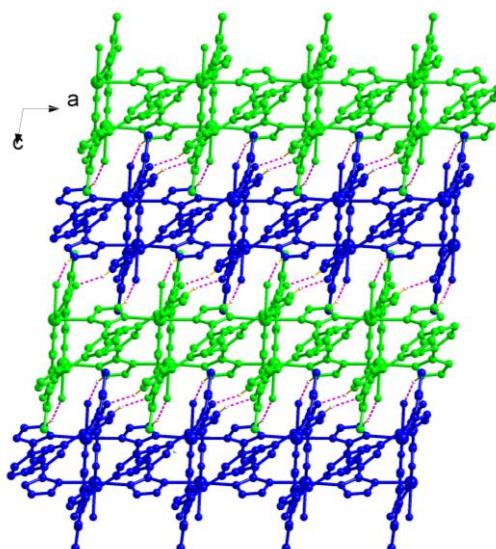

**Figure S2.** The 3D framework of **3** with hydrogen bonds indicated by dashed lines.

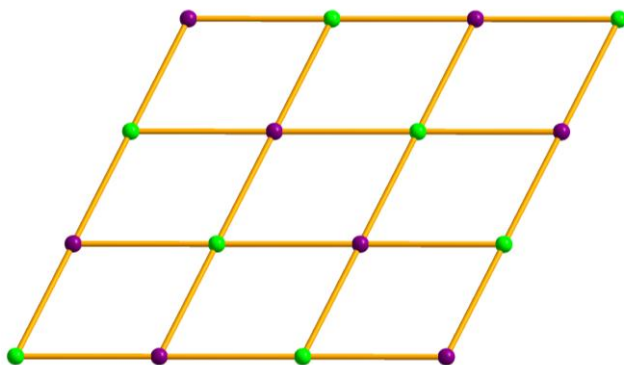

**Figure S3.** Schematic representation of 2D network with (4, 4) topology in complex **4** where the bright green and violet balls represent the binuclear  $[\text{Cd}_2\text{N}_4]$  subunit and the centers of benzene rings of  $\text{btca}^{4-}$  ligands respectively.

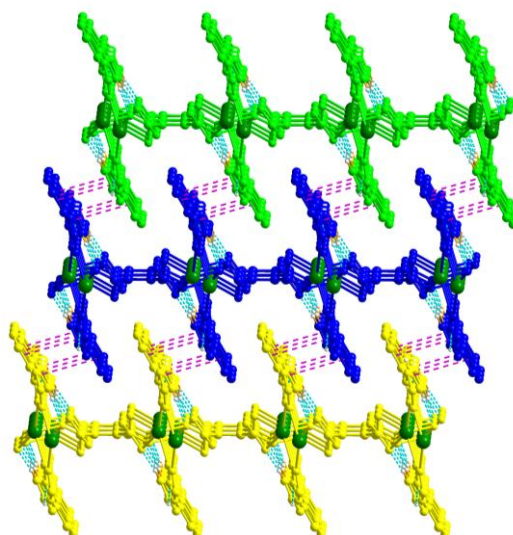

**Figure S4.** The 3D framework packed by  $\pi$  -  $\pi$  stacking interactions of aromatic rings highlighted by the pink dashed lines in complex **4** (the turquoise dashed lines represent intramolecular hydrogen bonds of 2D layers).

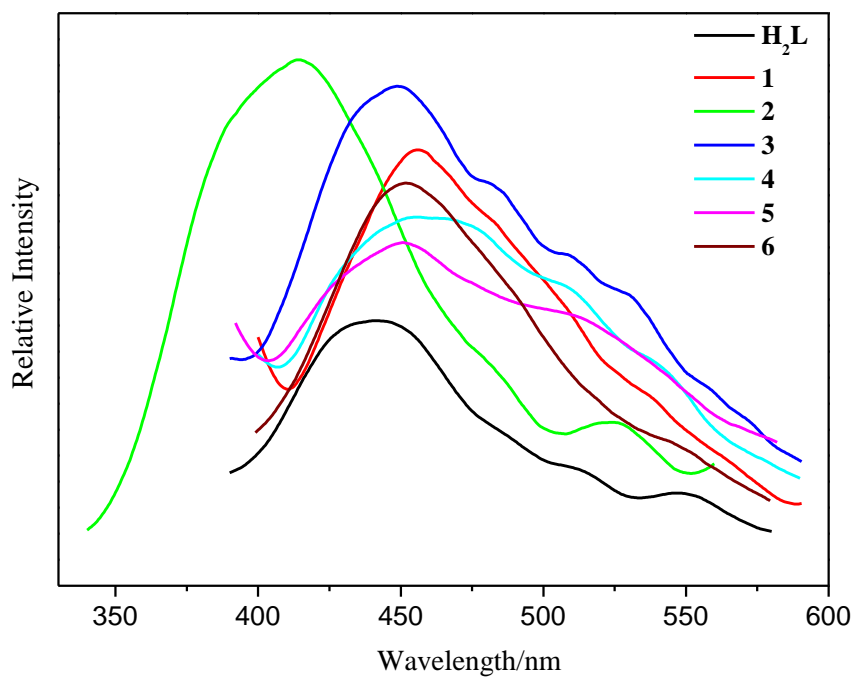

**Figure S5.** Emission spectra of  $H_2L$  ligand and complexes **1** - **6**.

Table S1 Selected bond lengths [ $\text{\AA}$ ] and bond angles [ $^\circ$ ] for complexes **1** - **6**

**1**

|                   |           |                     |            |
|-------------------|-----------|---------------------|------------|
| Cd(1)-N(4)        | 2.451(3)  | Cd(1)-N(6)#1        | 2.208(2)   |
| Cd(1)-N(1)#2      | 2.266(2)  | Cd(1)-O(1)          | 2.241(2)   |
| Cd(1)-O(2)        | 2.586(3)  | Cd(1)-O(3)          | 2.426(3)   |
| N(6)#1-Cd(1)-O(1) | 138.64(9) | N(6)#1-Cd(1)-N(1)#2 | 104.34(8)  |
| O(1)-Cd(1)-N(1)#2 | 117.00(8) | N(6)#1-Cd(1)-O(3)   | 100.87(11) |
| O(1)-Cd(1)-O(3)   | 81.17(11) | N(1)#2-Cd(1)-O(3)   | 86.68(13)  |
| N(6)#1-Cd(1)-N(4) | 94.82(8)  | O(1)-Cd(1)-N(4)     | 87.93(8)   |
| N(1)#2-Cd(1)-N(4) | 88.22(9)  | O(3)-Cd(1)-N(4)     | 164.26(10) |

**2**

|                     |           |                   |            |
|---------------------|-----------|-------------------|------------|
| Cd(1)-N(1)          | 2.467(3)  | Cd(1)-N(6)#3      | 2.216(2)   |
| Cd(1)-N(4)#4        | 2.275(2)  | Cd(1)-O(2)        | 2.284(2)   |
| Cd(1)-O(3)          | 2.351(3)  | Cd(1)-O(1)        | 2.527(2)   |
| N(6)#3-Cd(1)-N(4)#4 | 109.48(9) | N(6)#3-Cd(1)-O(2) | 140.78(9)  |
| N(4)#4-Cd(1)-O(2)   | 109.38(9) | N(6)#3-Cd(1)-O(3) | 91.72(11)  |
| N(4)#4-Cd(1)-O(3)   | 88.77(10) | O(2)-Cd(1)-O(3)   | 83.99(12)  |
| N(6)#3-Cd(1)-N(1)   | 95.46(9)  | N(4)#4-Cd(1)-N(1) | 90.66(9)   |
| O(2)-Cd(1)-N(1)     | 89.20(9)  | O(3)-Cd(1)-N(1)   | 172.56(11) |
| N(6)#3-Cd(1)-O(1)   | 88.56(9)  | N(4)#4-Cd(1)-O(1) | 160.19(9)  |
| O(2)-Cd(1)-O(1)     | 54.07(8)  | O(3)-Cd(1)-O(1)   | 99.11(11)  |
| N(1)-Cd(1)-O(1)     | 79.18(9)  |                   |            |

**3**

|                     |            |                     |            |
|---------------------|------------|---------------------|------------|
| Cd(1)-N(1)          | 2.390(2)   | Cd(1)-N(4)#6        | 2.357(2)   |
| Cd(1)-O(1)          | 2.2336(16) | Cd(1)-O(5)          | 2.3206(18) |
| Cd(1)-O(3)#5        | 2.3447(16) | Cd(1)-O(4)#5        | 2.4110(19) |
| O(1)-Cd(1)-O(5)     | 92.05(7)   | O(1)-Cd(1)-O(3)#5   | 162.34(6)  |
| O(5)-Cd(1)-O(3)#5   | 105.34(6)  | O(1)-Cd(1)-N(4)#6   | 95.64(6)   |
| O(5)-Cd(1)-N(4)#6   | 88.31(7)   | O(3)#5-Cd(1)-N(4)#6 | 88.04(7)   |
| O(1)-Cd(1)-N(1)     | 93.34(7)   | O(5)-Cd(1)-N(1)     | 85.91(7)   |
| O(3)#5-Cd(1)-N(1)   | 85.03(7)   | N(4)#6-Cd(1)-N(1)   | 169.49(7)  |
| O(1)-Cd(1)-O(4)#5   | 107.74(6)  | O(5)-Cd(1)-O(4)#5   | 160.19(7)  |
| O(3)#5-Cd(1)-O(4)#5 | 54.84(6)   | N(4)#6-Cd(1)-O(4)#5 | 90.48(7)   |

N(1)-Cd(1)-O(4)#5 91.98(7)

#### 4

|                     |            |                     |            |
|---------------------|------------|---------------------|------------|
| Cd(1)-N(2)          | 2.313(3)   | Cd(1)-N(1)#7        | 2.304(3)   |
| Cd(1)-O(1)          | 2.236(2)   | Cd(1)-O(5)          | 2.326(3)   |
| Cd(1)-O(4)#8        | 2.364(2)   | Cd(1)-O(3)#8        | 2.465(2)   |
| O(1)-Cd(1)-N(1)#7   | 101.56(10) | O(1)-Cd(1)-N(2)     | 101.07(10) |
| N(1)#7-Cd(1)-N(2)   | 117.07(9)  | O(1)-Cd(1)-O(5)     | 178.63(10) |
| N(1)#7-Cd(1)-O(5)   | 79.18(11)  | N(2)-Cd(1)-O(5)     | 79.54(13)  |
| O(1)-Cd(1)-O(4)#8   | 84.99(10)  | N(1)#7-Cd(1)-O(4)#8 | 150.21(9)  |
| N(2)-Cd(1)-O(4)#8   | 89.50(9)   | O(5)-Cd(1)-O(4)#8   | 93.80(12)  |
| O(1)-Cd(1)-O(3)#8   | 94.20(9)   | N(1)#7-Cd(1)-O(3)#8 | 96.41(8)   |
| N(2)-Cd(1)-O(3)#8   | 138.92(9)  | O(5)-Cd(1)-O(3)#8   | 84.56(12)  |
| O(4)#8-Cd(1)-O(3)#8 | 53.91(8)   |                     |            |

#### 5

|                    |           |                      |           |
|--------------------|-----------|----------------------|-----------|
| Zn(1)-N(1)         | 2.005(2)  | Zn(1)-N(5)#9         | 1.975(2)  |
| Zn(1)-O(1)         | 1.988(2)  | Zn(1)-O(2)#10        | 2.014(2)  |
| N(5)#9-Zn(1)-O(1)  | 113.40(9) | N(5)#9-Zn(1)-N(1)    | 110.13(9) |
| O(1)-Zn(1)-N(1)    | 99.19(9)  | N(5)#9-Zn(1)-O(2)#10 | 112.81(9) |
| O(1)-Zn(1)-O(2)#10 | 95.67(8)  | N(1)-Zn(1)-O(2)#10   | 123.59(9) |

#### 6

|                       |            |                     |            |
|-----------------------|------------|---------------------|------------|
| Zn(1)-N(12)           | 1.976(3)   | Zn(1)-O(2)          | 1.980(2)   |
| Zn(1)-O(6)#11         | 1.983(2)   | Zn(1)-N(4)          | 2.005(3)   |
| Zn(2)-O(10)           | 1.980(2)   | Zn(2)-N(5)#12       | 1.986(3)   |
| Zn(2)-N(7)#13         | 2.004(3)   | Zn(2)-O(5)          | 2.015(2)   |
| Zn(3)-N(18)           | 1.965(3)   | Zn(3)-O(1)          | 1.972(2)   |
| Zn(3)-N(16)#14        | 2.000(3)   | Zn(3)-O(9)#15       | 2.003(2)   |
| N(12)-Zn(1)-O(2)      | 111.92(11) | N(12)-Zn(1)-O(6)#11 | 116.81(11) |
| O(2)-Zn(1)-O(6)#11    | 98.09(10)  | N(12)-Zn(1)-N(4)    | 108.41(12) |
| O(2)-Zn(1)-N(4)       | 121.66(11) | O(6)#11-Zn(1)-N(4)  | 99.40(11)  |
| O(10)-Zn(2)-N(5)#12   | 114.68(11) | O(10)-Zn(2)-N(7)#13 | 101.91(11) |
| N(5)#12-Zn(2)-N(7)#13 | 108.51(12) | O(10)-Zn(2)-O(5)    | 92.97(9)   |
| N(5)#12-Zn(2)-O(5)    | 110.68(11) | N(7)#13-Zn(2)-O(5)  | 126.79(11) |

|                     |            |                        |            |
|---------------------|------------|------------------------|------------|
| N(18)-Zn(3)-O(1)    | 113.92(11) | N(18)-Zn(3)-N(16)#14   | 109.27(11) |
| O(1)-Zn(3)-N(16)#14 | 99.28(11)  | N(18)-Zn(3)-O(9)#5     | 113.02(11) |
| O(1)-Zn(3)-O(9)#15  | 95.40(9)   | N(16)#14-Zn(3)-O(9)#15 | 124.08(10) |

Symmetry transformations used to generate equivalent atoms: #1  $-x+2,-y+1,-z+1$ , #2  $-x+2,y+1/2,-z+1/2$ , #3  $-x+1/2,-y+3/2,-z+1$ , #4  $-x+1/2,y-1/2,-z+1/2$ , #5  $-x+3/2,y+1/2,-z+3/2$ , #6  $x-1,y,z$ , #7  $-x+1,-y+2,-z+1$ , #8  $-x+1,-y+2,-z$ , #9  $-x+1/2,-y+1,z+1/2$ , #10  $-x+1/2,y-1/2,z$ , #11  $-x+1,-y+1,-z$ , #12  $x,-y+3/2,z-1/2$ , #13  $x,-y+1/2,z-1/2$ , #14  $-x+2,y+1/2,-z+1/2$ , #15  $-x+2,-y+1,-z$ .

Table S2 Hydrogen bonding data for complexes **1 - 6**

| D-H...A           | d(D...A) (Å) | ∠D-H...A (°) |
|-------------------|--------------|--------------|
| <b>Compound 1</b> |              |              |
| N5-H5...N3#1      | 2.916(3)     | 172          |
| C6-H6...N3#1      | 3.515(4)     | 169          |
| C10-H10...N2#2    | 3.245(4)     | 130          |
| <b>Compound 2</b> |              |              |
| N5-H5A...N2#3     | 2.933(5)     | 169          |
| C9-H9...O5#4      | 3.458(10)    | 161          |
| <b>Compound 3</b> |              |              |
| N3-H3A...O5#5     | 2.919(3)     | 159          |
| N5-H5...O2#6      | 2.673(3)     | 145          |
| C2-H2...O1#7      | 3.137(3)     | 159          |
| C6-H6...O4#8      | 3.317(3)     | 170          |
| C9-H9...O4#8      | 3.261(3)     | 132          |
| C10-H10...N2#9    | 3.308(3)     | 144          |
| <b>Compound 4</b> |              |              |
| N4-H4A...O7       | 3.121(7)     | 157          |
| N5-H5...O4#10     | 2.711(5)     | 177          |
| C9-H9...O1#10     | 3.426(4)     | 172          |
| C10-H10...N3#11   | 3.134(5)     | 132          |
| <b>Compound 5</b> |              |              |

|                |          |     |
|----------------|----------|-----|
| N4-H4A...O4#12 | 2.799(3) | 155 |
| N6-H6A...N2#13 | 3.364(3) | 146 |
| N6-H6A...N3#13 | 2.886(3) | 168 |
| C6-H6...O3#12  | 3.375(3) | 158 |
| C8-H8...O3#12  | 3.051(3) | 140 |

Compound 6

|                   |          |     |
|-------------------|----------|-----|
| N1-H1A...O8#14    | 2.786(4) | 152 |
| N6-H6...N2#15     | 2.931(4) | 171 |
| N10-H10A...O4     | 2.792(4) | 154 |
| N11-H11A...N9#16  | 2.919(4) | 173 |
| N13-H13A...O12#17 | 2.779(4) | 152 |
| N17-H17...N14#18  | 2.847(4) | 166 |
| N17-H17...N15#18  | 3.314(4) | 144 |
| C5-H5...O7#14     | 3.272(5) | 144 |
| C9-H9...O7#14     | 3.002(5) | 130 |
| C10-H10...N8#19   | 3.207(5) | 123 |
| C15-H15...O3      | 3.308(5) | 148 |
| C19-H19...O3      | 3.026(4) | 141 |
| C20-H20...N3      | 3.230(5) | 123 |
| C25-H25...O11#17  | 3.363(4) | 157 |
| C29-H29...O11#17  | 3.028(4) | 139 |

Symmetry transformations used to generate equivalent atoms: #1  $2-x, -1/2+y, 1/2-z$ ; #2  $x, 1/2-y, 1/2+z$ ; #3  $1/2-x, 1/2+y, 1/2-z$ ; #4  $x, 1-y, 1/2+z$ ; #5  $2-x, 1-y, 1-z$ ; #6  $-1/2+x, 1/2-y, 1/2+z$ ; #7  $1+x, y, z$ ; #8  $3/2-x, 1/2+y, 3/2-z$ ; #9  $3/2-x, -1/2+y, 3/2-z$ ; #10  $1-x, 2-y, 1-z$ ; #11  $x, y, 1+z$ ; #12  $x, 3/2-y, -1/2+z$ ; #13  $1/2+x, y, 1/2-z$ ; #14  $x, 3/2-y, 1/2+z$ ; #15  $x, 3/2-y, -1/2+z$ ; #16  $x, 1/2-y, 1/2+z$ ; #17  $2-x, 1-y, -z$ ; #18  $x, 1/2-y, -1/2+z$ ; #19  $x, 1+y, z$ .

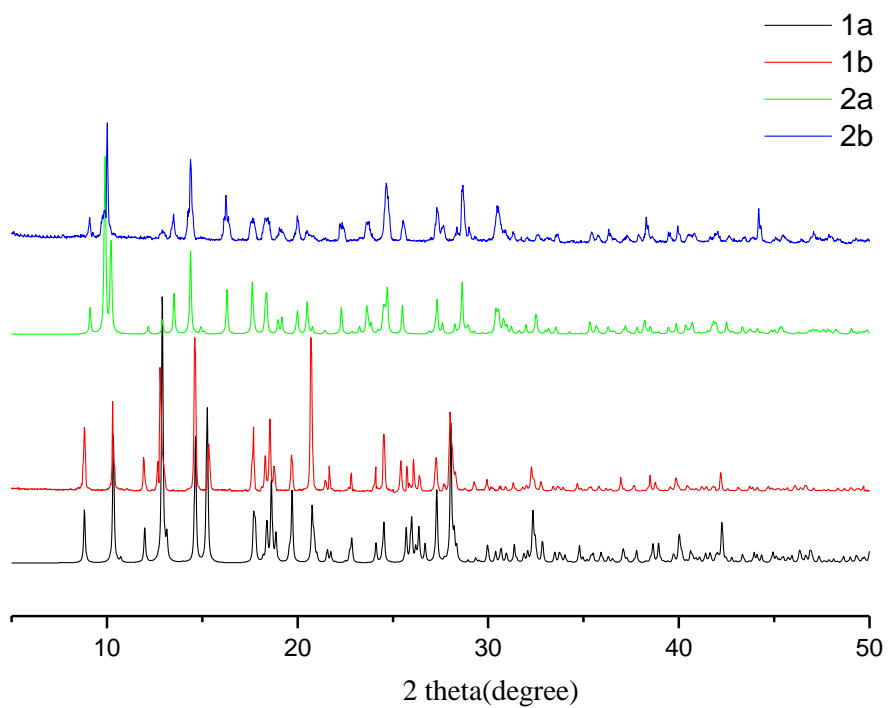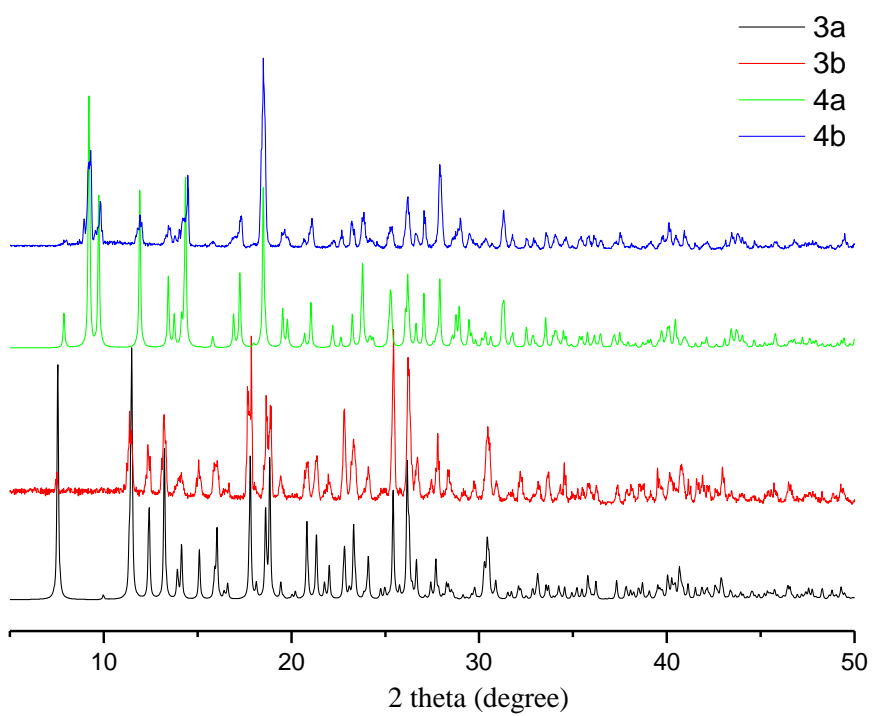



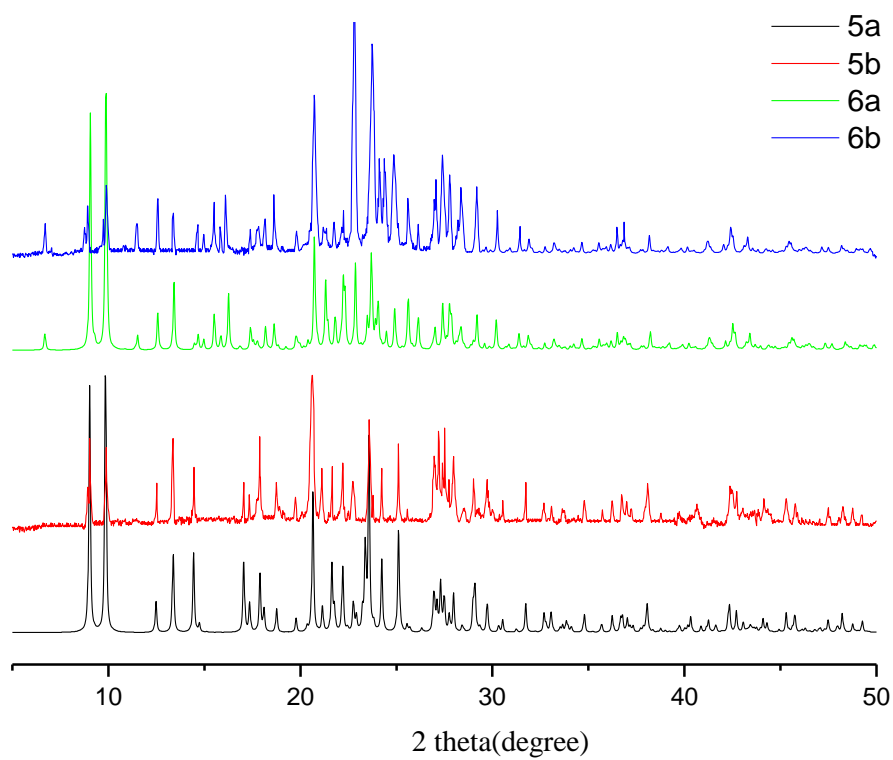

**Figure S6.** The X-ray powder diffraction patterns of **1 - 6**: a – simulated; b – as-synthesized.

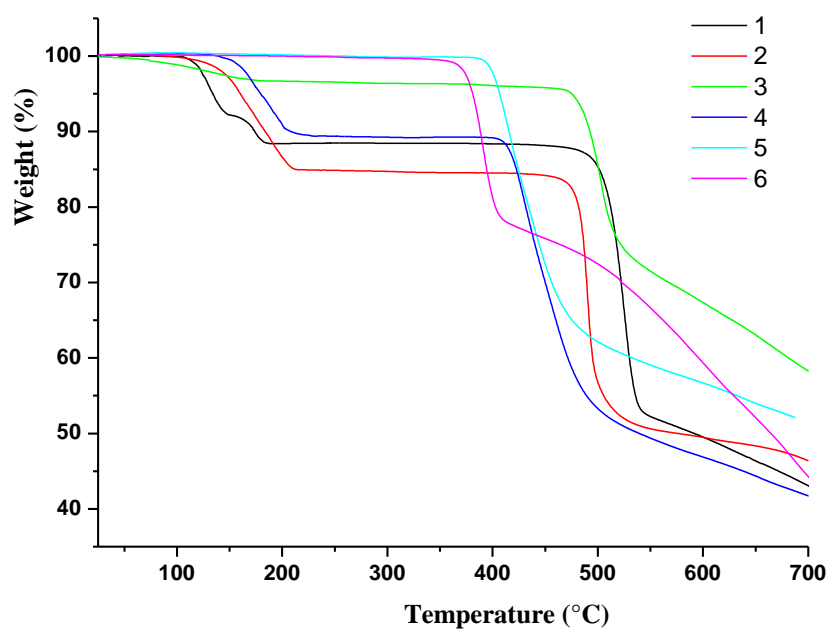

**Figure S7.** The TG curves of **1 - 6**.
